# Supplementary material for: All‐oral direct‐acting antiviral therapy against hepatitis C virus (HCV) in human immunodeficiency virus/HCV–coinfected subjects in real‐world practice: Madrid coinfection registry findings
Source: PubMed Central journal article supplement — Hepatology. 2018 Apr 27;68(1):32–47. doi: 10.1002/hep.29814 (PMC6055848; doi:10.1002/hep.29814), 2018-04-27
Supplement: HEP-68-32-s001.pdf [file HEP-68-32-s001.pdf]

## Supplementary Material

**Table S1.** Baseline characteristics of study population according to availability of HIV data

|                                | Availability of HIV data |                        | <i>P</i> |
|--------------------------------|--------------------------|------------------------|----------|
|                                | No<br>N = 898 (37.9)     | Yes<br>N = 1471 (62.1) |          |
| <b>Variables</b>               |                          |                        |          |
| Age - median (IQR)             | 51 (48 - 54)             | 50 (47 - 54)           | 0.003    |
| Male sex - n (%)               | 708 (78.8)               | 1144 (77.8)            | 0.54     |
| Cirrhosis - n (%)              |                          |                        | 0.002    |
| No                             | 576 (64.1)               | 834 (56.7)             |          |
| Compensated                    | 271 (30.2)               | 532 (36.2)             |          |
| Decompensated                  | 51 (5.7)                 | 105 (7.1)              |          |
| Prior anti-HCV therapy - n (%) |                          |                        | 0.60     |
| No                             | 581 (64.7)               | 932 (63.4)             |          |
| Yes                            | 317 (35.3)               | 538 (36.6)             |          |
| Unknown                        | 0                        | 1 (0.1)                |          |
| Genotype - n (%)               |                          |                        | 0.54     |
| 1                              |                          |                        |          |
| 1a                             | 365 (40.6)               | 603 (41.0)             |          |
| 1b                             | 136 (15.1)               | 222 (15.1)             |          |
| 1 non-subtyped                 | 33 (3.7)                 | 70 (4.8)               |          |
| 2                              | 14 (1.6)                 | 13 (0.9)               |          |
| 3                              | 137 (15.3)               | 218 (14.8)             |          |
| 4                              | 206 (22.9)               | 324 (22.0)             |          |
| Mixed                          | 6 (0.7)                  | 18 (1.2)               |          |
| Indeterminate                  | 1 (0.1)                  | 3 (0.2)                |          |
| HCV RNA                        |                          |                        |          |
| Known - n (%)                  | 898 (100)                | 1471 (100)             |          |
| Log IU/mL - Median (IQR)       | 6.3 (5.8 - 6.7)          | 6.2 (5.8 - 6.6)        | 0.08     |

**Table S2.** Treatment regimens according to HCV genotype

| Regimen - n (%) | G1<br>n = 1,429 | G2<br>n = 27 | G3<br>n = 355 | G4<br>n = 530 | Other*<br>n = 28 |
|-----------------|-----------------|--------------|---------------|---------------|------------------|
| SOF/LDV         | 997 (69.8)      | -            | 83 (23.4)     | 366 (69.1)    | 21 (75.0)        |
| SOF+DCV         | 55 (3.8)        | 5 (18.5)     | 264 (74.4)    | 18 (3.4)      | 4 (14.3)         |
| DSV+OBV/PTV/r   | 310 (21.7)      | -            | -             | 1 (0.2)       | 3 (10.7)         |
| OBV/PTV/r       | 4 (0.3)         | -            | -             | 128 (24.1)    | -                |
| SOF+SMV         | 56 (3.9)        | -            | -             | 15 (2.8)      | -                |
| SOF+RBV         | 2 (0.1)         | 22 (81.5)    | 8 (2.2)       | -             | -                |
| SMV+DCV         | 3 (0.2)         | -            | -             | 1 (0.2)       | -                |
| SOF+SMV+DCV     | 2 (0.1)         | -            | -             | -             | -                |
| SOF+OBV/PTV/r   | -               | -            | -             | 1 (0.2)       | -                |
| Use of RBV      | 338 (23.6)      | 22 (81.5)    | 191 (53.8)    | 159 (30.0)    | 14 (50.0)        |

\* Mixed genotypes 24, undetermined genotype 4.

**Table S3.** Treatment outcomes for HCV genotype 3 with sofosbuvir (SOF) plus daclatasvir (DCV) with or without ribavirin (RBV).

|                           | No Cirrhosis       | Compensated Cirrhosis  |                        |                    |                            |
|---------------------------|--------------------|------------------------|------------------------|--------------------|----------------------------|
|                           | 12 wks.<br>SOF+DCV | 12 wks.<br>SOF+DCV+RBV | 24 wks.<br>SOF+DCV+RBV | 24 wks.<br>SOF+DCV | Total cirrhosis<br>SOF+DCV |
|                           | N=119              | N=11                   | N=48                   | N=17               | N=83                       |
| SVR12 (ITT) - n (%)       | 113 (95.0)         | 9 (81.8)               | 45 (93.7)              | 15 (88.2)          | 76 (91.6)                  |
| % SVR12 (ITT) - 95% CI    | 89.3 - 98.1        | 48.2 - 97.7            | 82.8 - 98.7            | 63.6 - 98.5        | 83.3 - 96.5                |
| Relapse - n (%)           | 3 (2.5)            | 0                      | 1 (2.1)                | 2 (11.8)           | 3 (3.6)                    |
| Breakthrough - n (%)      | 0                  | 1 (9.1)                | 0                      | 0                  | 1 (1.2)                    |
| D/C due to AEs - n (%)    | 0                  | 0                      | 0                      | 0                  | 0                          |
| D/C other reasons - n (%) | 3 (2.5)            | 1 (9.1)                | 2 (4.2)                | 0                  | 3 (3.6)                    |
| SVR12 (m-ITT) - n (%)     | 113 (97.4)         | 9 (90.0)               | 45 (97.8)              | 15 (88.2)          | 76 (95.0)                  |
| % SVR12 (m-ITT) - 95% CI  | 92.6 - 99.5        | 55.5 - 99.7            | 88.5 - 99.9            | 63.6 - 98.5        | 87.7 - 98.6                |

**Table S4.** Treatment outcomes for HCV genotype 3 with sofosbuvir/ledipasvir (SOF/LDV) with or without ribavirin (RBV) in patients with compensated cirrhosis.

|                           | Compensated Cirrhosis  |                        |                    |                  |
|---------------------------|------------------------|------------------------|--------------------|------------------|
|                           | 12 wks.<br>SOF/LDV+RBV | 24 wks.<br>SOF/LDV+RBV | 24 wks.<br>SOF/LDV | Total<br>SOF/LDV |
|                           | N=4                    | N=52                   | N=9                | N=65             |
| SVR12 (ITT) - n (%)       | 4 (100.0)              | 46 (88.5)              | 9 (100.0)          | 59 (90.8)        |
| % SVR12 (ITT) - 95% CI    | -                      | 76.6 - 95.6            | -                  | 81.0 - 96.5      |
| Relapse - n (%)           | 0                      | 3 (5.8)                | 0                  | 3 (4.6)          |
| Breakthrough - n (%)      | 0                      | 0                      | 0                  | 0                |
| D/C due to AEs - n (%)    | 0                      | 0                      | 0                  | 0                |
| D/C other reasons - n (%) | 0                      | 1 (1.9)                | 0                  | 1 (1.5)          |
| Death                     | 0                      | 2 (3.8)                |                    | 2 (3.1)          |
| SVR12 (m-ITT) - n (%)     | 4 (100.0)              | 46 (90.2)              | 9 (100.0)          | 59 (92.2)        |
| % SVR12 (m-ITT) - 95% CI  | -                      | 78.6 - 96.7            | -                  | 82.7 - 97.4      |

**Table S5.** Treatment outcomes for HCV genotype 4 with sofosbuvir/ledipasvir (SOF/LDV) or ombitasvir/paritaprevir/ribavirin (OBV/PTV/RBV) in non-cirrhotic patients.

|                           | <b>12 wks.</b> | <b>12 wks.</b>     | <b>P</b> |
|---------------------------|----------------|--------------------|----------|
|                           | <b>SOF/LDV</b> | <b>OBV/PTV/RBV</b> |          |
|                           | N=218          | N=111              |          |
| SVR12 (ITT) - n (%)       | 200 (91.7)     | 102 (91.9)         | 0.96     |
| % SVR12 (ITT) - 95% CI    | 87.3 - 95.0    | 85.2 - 96.2        |          |
| Relapse - n (%)           | 9 (4.1)        | 4 (3.6)            | 0.82     |
| Breakthrough - n (%)      | 0              | 1 (0.9)            | 0.16     |
| D/C due to AEs - n (%)    | 1 (0.5)        | 1 (0.9)            | 0.63     |
| D/C other reasons - n (%) | 8 (3.7)        | 3 (2.7)            | 0.64     |
| SVR12 (m-ITT) - n (%)     | 200 (95.2)     | 102 (94.4)         | 0.76     |
| % SVR12 (m-ITT) - 95% CI  | 91.4 - 97.7    | 88.3 - 97.9        |          |

**Table S6.** Treatment outcomes for HCV genotype 4 with sofosbuvir/ledipasvir (SOF/LDV) with or without ribavirin (RBV) in patients with compensated cirrhosis

|                           | <b>12 wks.</b> | <b>12 wks.</b>     | <b>24 wks.</b> | <b>24 wks.</b>     | <b>Total</b>   |
|---------------------------|----------------|--------------------|----------------|--------------------|----------------|
|                           | <b>SOF/LDV</b> | <b>SOF/LDV+RBV</b> | <b>SOF/LDV</b> | <b>SOF/LDV+RBV</b> | <b>SOF/LDV</b> |
|                           | N=28           | N=13               | N=74           | N=1                | N=116          |
| SVR12 (ITT) - n (%)       | 27 (96.4)      | 10 (76.9)          | 69 (93.2)      | 1 (100.0)          | 107 (92.2)     |
| % SVR12 (ITT) - 95% CI    | 81.7 - 99.9    | 46.2 - 95.0        | 84.9 - 97.8    | -                  | 85.8 - 96.4    |
| Relapse - n (%)           | 1 (3.6)        | 2 (15.4)           | 4 (5.4)        | 0                  | 7 (6.0)        |
| Breakthrough - n (%)      | 0              | 0                  | 0              | 0                  | 0              |
| D/C due to AEs - n (%)    | 0              | 0                  | 0              | 0                  | 0              |
| D/C other reasons - n (%) | 0              | 1 (7.7)            | 1 (1.4)        | 0                  | 2 (1.7)        |
| SVR12 (m-ITT) - n (%)     | 27 (96.4)      | 10 (83.3)          | 69 (94.5)      | 1 (100.0)          | 107 (93.9)     |
| % SVR12 (m-ITT) - 95% CI  | 81.7 - 99.9    | 51.6 - 97.9        | 86.6 - 98.5    | -                  | 87.8 - 97.5    |

**Table S7.** Results from univariable and multivariable logistic regression models performed to identify independent baseline predictors of treatment failure by m-ITT analysis considering all categories of liver-disease severity (N=2318)

| Variable                                           | Univariable          |        | Multivariable                    |        |
|----------------------------------------------------|----------------------|--------|----------------------------------|--------|
|                                                    | OR (95% CI)          | P      | OR (95% CI)                      | P      |
| Age                                                |                      | 0.042  |                                  | 0.10   |
| - <45                                              | 1.00                 |        | 1.00                             |        |
| - 45-54                                            | 1.34 (0.72 - 2.48)   |        | 1.17 (0.62 - 2.19)               |        |
| - ≥55                                              | 2.06 (1.06 - 4.00)   |        | 1.76 (0.88 - 3.49)               |        |
| Sex                                                |                      | 0.001  |                                  | 0.001  |
| - Female                                           | 1.00                 |        | 1.00                             |        |
| - Male                                             | 2.57 (1.46 - 4.50)   |        | 2.67 (1.51 - 4.75)               |        |
| HIV risk factor                                    |                      | 0.55   |                                  |        |
| - Non-IDU                                          | 1.00                 |        |                                  |        |
| - IDU                                              | 1.20 (0.63 - 2.30)   |        |                                  |        |
| - Other/Unknown                                    | 1.39 (0.71 - 2.72)   |        |                                  |        |
| CDC clinical category                              |                      | 0.43   |                                  |        |
| - A/B                                              | 1.00                 |        |                                  |        |
| - C                                                | 1.21 (0.78 - 1.88)   |        |                                  |        |
| - Unknown                                          | 1.29 (0.87 - 1.92)   |        |                                  |        |
| Nadir CD4+ T-cell count - cells/mm <sup>3</sup>    |                      | 0.098  |                                  |        |
| - ≥ 200                                            | 1.00                 |        |                                  |        |
| - < 200                                            | 1.58 (1.00 - 2.50)   |        |                                  |        |
| - Unknown                                          | 1.59 (0.99 - 2.55)   |        |                                  |        |
| Baseline CD4+ T-cell count - cells/mm <sup>3</sup> |                      | 0.004  |                                  | 0.02   |
| - ≥ 200                                            | 1.00                 |        | 1.00                             |        |
| - < 200                                            | 2.63 (1.46 - 4.76)   |        | 2.40 (1.29 - 4.49)               |        |
| - Unknown                                          | 1.40 (0.97 - 2.02)   |        | 1.08 (0.51 - 2.30)               |        |
| Baseline HIV RNA copies/mL                         |                      | 0.82   |                                  |        |
| - < 50                                             | 1.00                 |        |                                  |        |
| - ≥ 50                                             | 1.07 (0.42 - 2.71)   |        |                                  |        |
| - Unknown                                          | 1.12 (0.78 - 1.62)   |        |                                  |        |
| cART                                               |                      | 0.81   |                                  |        |
| - Yes                                              | 1.00                 |        |                                  |        |
| - No                                               | 1.16 (0.35 - 3.79)   |        |                                  |        |
| Liver stiffness - kPa <sup>a</sup>                 |                      | <0.001 |                                  |        |
| - < 9.5                                            | 1.00                 |        |                                  |        |
| - 9.5 - 12.5                                       | 0.86 (0.47 - 1.57)   |        |                                  |        |
| - 12.6 - 19.4                                      | 0.79 (0.42 - 1.49)   |        |                                  |        |
| - ≥ 19.5                                           | 3.03 (2.02 - 4.54)   |        |                                  |        |
| - Unknown                                          | 2.68 (0.91 - 7.93)   |        |                                  |        |
| HCV genotype                                       |                      | 0.22   |                                  |        |
| - 1                                                | 1.00                 |        |                                  |        |
| - 2                                                | 3.04 (1.02 - 9.00)   |        |                                  |        |
| - 3                                                | 1.02 (0.61 - 1.71)   |        |                                  |        |
| - 4                                                | 1.35 (0.90 - 2.03)   |        |                                  |        |
| - Other                                            | 1.40 (0.32 - 6.01)   |        |                                  |        |
| HCV RNA IU/mL                                      |                      | 0.20   |                                  | 0.04   |
| - < 800,000                                        | 1.00                 |        | 1.00                             |        |
| - ≥ 800,000                                        | 1.29 (0.87 - 1.91)   |        | 1.53 (1.01 - 2.32)               |        |
| Naïve for anti-HCV therapy                         |                      | 0.48   |                                  |        |
| - Yes                                              | 1.00                 |        |                                  |        |
| - No                                               | 1.13 (0.80 - 1.61)   |        |                                  |        |
| Liver disease category                             |                      | <0.001 |                                  | <0.001 |
| - Non-cirrhotic                                    | 1.00                 |        | 1.00 <sup>†</sup>                |        |
| - Compensated cirrhosis                            | 1.71 (1.17 - 2.51)   |        | 1.50 (1.00 - 2.25) <sup>†‡</sup> |        |
| - Decompensated cirrhosis                          | 4.97 (3.04 - 8.14)   |        | 3.73 (2.12 - 6.58) <sup>†‡</sup> |        |
| Anti-HCV regimen                                   |                      | <0.001 |                                  | <0.001 |
| - SOF/LDV                                          | 1.00                 |        | 1.00                             |        |
| - SOF+DCV                                          | 1.33 (0.81 - 2.18)   |        | 1.14 (0.68 - 1.90)               |        |
| - DSV+OBV/PTV/r                                    | 0.90 (0.50 - 1.62)   |        | 1.00 (0.55 - 1.81)               |        |
| - OBV/PTV/r                                        | 0.94 (0.40 - 2.21)   |        | 1.29 (0.54 - 3.10)               |        |
| - SOF+SMV                                          | 6.03 (3.33 - 10.93)  |        | 3.99 (2.09 - 7.65)               |        |
| - SOF+RBV                                          | 4.60 (1.83 - 11.56)  |        | 4.16 (1.58 - 10.96)              |        |
| - SMV+DCV                                          | 19.15 (2.66 - 138.0) |        | 16.37 (2.11 - 126.8)             |        |
| - SOF+SMV+DCV                                      | -                    |        | -                                |        |
| - SOF+OBV/PTV/r                                    | -                    |        | -                                |        |
| Duration of anti-HCV treatment                     |                      | 0.11   |                                  |        |
| - 8 weeks                                          | 1.19 (0.56 - 2.52)   |        |                                  |        |
| - 12 weeks                                         | 1.00                 |        |                                  |        |
| - 16 weeks                                         | -                    |        |                                  |        |
| - 24 weeks                                         | 1.48 (1.03 - 2.14)   |        |                                  |        |
| Ribavirin use                                      |                      | 0.46   |                                  |        |
| - No                                               | 1.00                 |        |                                  |        |
| - Yes                                              | 1.15 (0.80 - 1.65)   |        |                                  |        |

<sup>†</sup>P=0.048; <sup>‡</sup>P<0.001; <sup>‡‡</sup>P=0.001.

<sup>a</sup> Liver stiffness cutoffs: < 9.5 kPa, cutoff accurate to rule out advanced fibrosis-cirrhosis (METAVIR F3-F4); ≤ 12.5 kPa, cutoff accurate to rule out liver cirrhosis; ≤ 19.5 kPa, cutoff accurate to rule out high risk of esophageal varices.

**Table S8.** Results from univariable and multivariable logistic regression models to identify independent baseline predictors of treatment failure by ITT analysis in non-cirrhotic patients (N = 1410)

| Variable                                           | Univariable         |       | Multivariable      |       |
|----------------------------------------------------|---------------------|-------|--------------------|-------|
|                                                    | OR (95% CI)         | P     | OR (95% CI)        | P     |
| Age                                                |                     | 0.40  |                    |       |
| - <45                                              | 1.00                |       |                    |       |
| - 45-54                                            | 1.63 (0.77 – 3.47)  |       |                    |       |
| - ≥55                                              | 1.75 (0.74 – 4.14)  |       |                    |       |
| Sex                                                |                     | 0.02  |                    | 0.03  |
| - Female                                           | 1.00                |       | 1.00               |       |
| - Male                                             | 2.15 (1.13 – 4.10)  |       | 2.10 (1.09 – 4.02) |       |
| HIV risk factor                                    |                     | 0.21  |                    |       |
| - Non-IDU                                          | 1.00                |       |                    |       |
| - IDU                                              | 1.99 (0.84 – 4.72)  |       |                    |       |
| - Other/Unknown                                    | 1.53 (0.62 – 3.76)  |       |                    |       |
| CDC clinical category                              |                     | 0.005 |                    | 0.03  |
| - A/B                                              | 1.00                |       | 1.00               |       |
| - C                                                | 2.33 (1.37 – 3.96)  |       | 2.04 (1.19 – 3.52) |       |
| - Unknown                                          | 1.24 (0.72 – 2.13)  |       | 1.19 (0.42 – 3.38) |       |
| Nadir CD4+ T-cell count – cells/mm <sup>3</sup>    |                     | 0.060 |                    |       |
| - ≥ 200                                            | 1.00                |       |                    |       |
| - < 200                                            | 1.93 (1.10 – 3.40)  |       |                    |       |
| - Unknown                                          | 1.33 (0.73 – 2.41)  |       |                    |       |
| Baseline CD4+ T-cell count – cells/mm <sup>3</sup> |                     | 0.001 |                    | 0.006 |
| - ≥ 200                                            | 1.00                |       | 1.00               |       |
| - < 200                                            | 4.02 (1.90 – 8.52)  |       | 3.51 (1.62 – 7.59) |       |
| - Unknown                                          | 1.04 (0.65 – 1.66)  |       | 1.11 (0.42 – 2.95) |       |
| Baseline HIV-1 RNA copies/mL                       |                     | 0.42  |                    |       |
| - < 50                                             | 1.00                |       |                    |       |
| - ≥ 50                                             | 0.32 (0.04 – 2.40)  |       |                    |       |
| - Unknown                                          | 0.83 (0.52 – 1.32)  |       |                    |       |
| cART                                               |                     | 0.72  |                    |       |
| - Yes                                              | 1.00                |       |                    |       |
| - No                                               | 0.69 (0.09 – 5.16)  |       |                    |       |
| Liver stiffness – kPa <sup>a</sup>                 |                     | 0.69  |                    |       |
| - ≤ 7                                              | 1.00                |       |                    |       |
| - 7.1 – 9.4                                        | 1.22 (0.66 – 2.25)  |       |                    |       |
| - ≥ 9.5                                            | 0.91 (0.45 – 1.82)  |       |                    |       |
| - Unknown                                          | 1.51 (0.18 – 12.57) |       |                    |       |
| HCV genotype                                       |                     | 0.50  |                    |       |
| - 1                                                | 1.00                |       |                    |       |
| - 2                                                | 2.04 (0.46 – 9.14)  |       |                    |       |
| - 3                                                | 0.76 (0.36 – 1.64)  |       |                    |       |
| - 4                                                | 1.37 (0.84 – 2.23)  |       |                    |       |
| - Other                                            | 1.26 (0.16 – 9.81)  |       |                    |       |
| HCV RNA IU/mL                                      |                     | 0.087 |                    | 0.09  |
| - < 800,000                                        | 1.00                |       | 1.00               |       |
| - ≥ 800,000                                        | 1.59 (0.93 – 2.71)  |       | 1.59 (0.93 – 2.72) |       |
| Naïve for anti-HCV therapy                         |                     | 0.60  |                    |       |
| - Yes                                              | 1.00                |       |                    |       |
| - No                                               | 0.88 (0.55 – 1.42)  |       |                    |       |
| Anti-HCV regimen                                   |                     | 0.36  |                    |       |
| - SOF/LDV                                          | 1.00                |       |                    |       |
| - SOF+DCV                                          | 0.66 (0.31 – 1.40)  |       |                    |       |
| - DSV+OBV/PTV/r                                    | 0.58 (0.28 – 1.20)  |       |                    |       |
| - OBV/PTV/r                                        | 1.13 (0.54 – 2.34)  |       |                    |       |
| - SOF+SMV                                          | -                   |       |                    |       |
| - SOF+RBV                                          | 1.99 (0.44 – 8.94)  |       |                    |       |
| - SMV+DCV                                          | -                   |       |                    |       |
| - SOF+SMV+DCV                                      | -                   |       |                    |       |
| - SOF+OBV/PTV/r                                    | -                   |       |                    |       |
| Duration of anti-HCV treatment                     |                     | 0.33  |                    |       |
| - 8 weeks                                          | 1.10 (0.54 – 2.26)  |       |                    |       |
| - 12 weeks                                         | 1.00                |       |                    |       |
| - 16 weeks                                         | -                   |       |                    |       |
| - 24 weeks                                         | 0.23 (0.03 – 1.68)  |       |                    |       |
| Ribavirin use                                      |                     | 0.75  |                    |       |
| - No                                               | 1.00                |       |                    |       |
| - Yes                                              | 0.92 (0.54 – 1.55)  |       |                    |       |

<sup>a</sup> Liver stiffness cutoff: ≤ 7 kPa, cutoff to rule out no or mild fibrosis; < 9.5 kPa, cutoff to rule out advanced fibrosis-cirrhosis.

**Table S9.** Results from univariable and multivariable logistic regression models to identify independent baseline predictors of treatment failure by m-ITT analysis in patients without cirrhosis (N = 1380)

| Variable                                           | Univariable         |      | Multivariable      |      |
|----------------------------------------------------|---------------------|------|--------------------|------|
|                                                    | OR (95% CI)         | P    | OR (95% CI)        | P    |
| Age                                                |                     | 0.57 |                    |      |
| - <45                                              | 1.00                |      |                    |      |
| - 45-54                                            | 1.11 (0.49 - 2.54)  |      |                    |      |
| - ≥55                                              | 1.53 (0.60 - 3.91)  |      |                    |      |
| Sex                                                |                     | 0.01 |                    | 0.01 |
| - Female                                           | 1.00                |      | 1.00               |      |
| - Male                                             | 3.24 (1.28 - 8.17)  |      | 3.25 (1.29 - 8.21) |      |
| HIV risk factor                                    |                     | 0.79 |                    |      |
| - Non-IDU                                          | 1.00                |      |                    |      |
| - IDU                                              | 1.40 (0.54 - 3.66)  |      |                    |      |
| - Other/Unknown                                    | 1.38 (0.51 - 3.71)  |      |                    |      |
| CDC clinical category                              |                     | 0.42 |                    |      |
| - A/B                                              | 1.00                |      |                    |      |
| - C                                                | 1.57 (0.80 - 3.08)  |      |                    |      |
| - Unknown                                          | 1.25 (0.67 - 2.34)  |      |                    |      |
| Nadir CD4+ T-cell count - cells/mm <sup>3</sup>    |                     | 0.72 |                    |      |
| - ≥ 200                                            | 1.00                |      |                    |      |
| - < 200                                            | 1.32 (0.67 - 2.59)  |      |                    |      |
| - Unknown                                          | 1.22 (0.62 - 2.40)  |      |                    |      |
| Baseline CD4+ T-cell count - cells/mm <sup>3</sup> |                     | 0.29 |                    |      |
| - ≥ 200                                            | 1.00                |      |                    |      |
| - < 200                                            | 2.39 (0.81 - 7.08)  |      |                    |      |
| - Unknown                                          | 1.09 (0.63 - 1.91)  |      |                    |      |
| Baseline HIV-1 RNA copies/mL                       |                     | 0.93 |                    |      |
| - < 50                                             | 1.00                |      |                    |      |
| - ≥ 50                                             | -                   |      |                    |      |
| - Unknown                                          | 0.98 (0.56 - 1.70)  |      |                    |      |
| cART                                               |                     | -    |                    |      |
| - Yes                                              | 1.00                |      |                    |      |
| - No                                               | -                   |      |                    |      |
| Liver stiffness - kPa <sup>a</sup>                 |                     | 0.86 |                    |      |
| - ≤ 7                                              | 1.00                |      |                    |      |
| - 7.1 - 9.4                                        | 0.92 (0.45 - 1.86)  |      |                    |      |
| - ≥ 9.5                                            | 0.83 (0.37 - 1.83)  |      |                    |      |
| - Unknown                                          | 1.93 (0.23 - 16.28) |      |                    |      |
| HCV genotype                                       |                     | 0.30 |                    |      |
| - 1                                                | 1.00                |      |                    |      |
| - 2                                                | 2.86 (0.63-12.93)   |      |                    |      |
| - 3                                                | 0.40 (0.12 - 1.32)  |      |                    |      |
| - 4                                                | 1.14 (0.62 - 2.08)  |      |                    |      |
| - Other                                            | 1.76 (0.22 - 13.84) |      |                    |      |
| HCV RNA IU/mL                                      |                     | 0.11 |                    | 0.10 |
| - < 800,000                                        | 1.00                |      | 1.00               |      |
| - ≥ 800,000                                        | 1.74 (0.89 - 3.39)  |      | 1.75 (0.89 - 3.41) |      |
| Naïve for anti-HCV therapy                         |                     | 0.87 |                    |      |
| - Yes                                              | 1.00                |      |                    |      |
| - No                                               | 0.96 (0.54 - 1.69)  |      |                    |      |
| Anti-HCV regimen                                   |                     | 0.25 |                    |      |
| - SOF/LDV                                          | 1.00                |      |                    |      |
| - SOF+DCV                                          | 0.39 (0.12 - 1.27)  |      |                    |      |
| - DSV+OBV/PTV/r                                    | 0.81 (0.37 - 1.77)  |      |                    |      |
| - OBV/PTV/r                                        | 1.18 (0.49 - 2.85)  |      |                    |      |
| - SOF+SMV                                          | -                   |      |                    |      |
| - SOF+RBV                                          | 3.11 (0.68 - 14.20) |      |                    |      |
| - SMV+DCV                                          | -                   |      |                    |      |
| - SOF+SMV+DCV                                      | -                   |      |                    |      |
| - SOF+OBV/PTV/r                                    | -                   |      |                    |      |
| Duration of anti-HCV treatment                     |                     | 0.30 |                    |      |
| - 8 weeks                                          | 1.57 (0.73 - 3.41)  |      |                    |      |
| - 12 weeks                                         | 1.00                |      |                    |      |
| - 16 weeks                                         | -                   |      |                    |      |
| - 24 weeks                                         | 0.37 (0.05 - 2.72)  |      |                    |      |
| Ribavirin use                                      |                     | 0.83 |                    |      |
| - No                                               | 1.00                |      |                    |      |
| - Yes                                              | 1.07 (0.58 - 1.98)  |      |                    |      |

<sup>a</sup> Liver stiffness cutoff: ≤ 7 kPa, cutoff to rule out no or mild fibrosis; < 9.5 kPa, cutoff to rule out advanced fibrosis-cirrhosis.

**Table S10.** Results from univariable and multivariable logistic regression models to identify independent baseline predictors of treatment failure by ITT analysis in patients with compensated cirrhosis (N=803)

| Variable                                           | Univariable         |        | Multivariable       |       |
|----------------------------------------------------|---------------------|--------|---------------------|-------|
|                                                    | OR (95% CI)         | P      | OR (95% CI)         | P     |
| Age                                                |                     | 0.07   |                     | 0.03  |
| - <45                                              | 1.00                |        | 1.00                |       |
| - 45-54                                            | 1.64 (0.57 – 4.71)  |        | 1.55 (0.53 – 4.56)  |       |
| - ≥55                                              | 2.74 (0.92 – 8.18)  |        | 2.99 (0.97 – 9.19)  |       |
| Sex                                                |                     | 0.71   |                     |       |
| - Female                                           | 1.00                |        |                     |       |
| - Male                                             | 1.13 (0.59 – 2.16)  |        |                     |       |
| HIV risk factor                                    |                     | 0.04   |                     |       |
| - Non-IDU                                          | 1.00                |        |                     |       |
| - IDU                                              | 0.76 (0.29 – 2.02)  |        |                     |       |
| - Other/Unknown                                    | 1.49 (0.55 – 4.04)  |        |                     |       |
| CDC clinical category                              |                     | 0.01   |                     |       |
| - A/B                                              | 1.00                |        |                     |       |
| - C                                                | 1.47 (0.78 – 2.76)  |        |                     |       |
| - Unknown                                          | 2.37 (1.33 – 4.22)  |        |                     |       |
| Nadir CD4+ T-cell count – cells/mm <sup>3</sup>    |                     | 0.01   |                     |       |
| - ≥ 200                                            | 1.00                |        |                     |       |
| - < 200                                            | 1.61 (0.81 – 3.21)  |        |                     |       |
| - Unknown                                          | 2.75 (1.37 – 5.52)  |        |                     |       |
| Baseline CD4+ T-cell count – cells/mm <sup>3</sup> |                     | 0.02   |                     |       |
| - ≥ 200                                            | 1.00                |        |                     |       |
| - < 200                                            | 1.85 (0.78 – 4.39)  |        |                     |       |
| - Unknown                                          | 2.07 (1.24 – 3.46)  |        |                     |       |
| Baseline HIV RNA copies/mL                         |                     | 0.05   |                     |       |
| - < 50                                             | 1.00                |        |                     |       |
| - ≥ 50                                             | 1.58 (0.53 – 4.68)  |        |                     |       |
| - Unknown                                          | 1.88 (1.13 – 3.15)  |        |                     |       |
| cART                                               |                     | 0.22   |                     |       |
| - Yes                                              | 1.00                |        |                     |       |
| - No                                               | 2.23 (0.62 – 7.94)  |        |                     |       |
| Liver stiffness – kPa <sup>a</sup>                 |                     | <0.001 |                     | 0.001 |
| - < 19.5                                           | 1.00                |        | 1.00                |       |
| - ≥ 19.5                                           | 3.32 (1.84 – 5.98)  |        | 3.03 (1.65 – 5.54)  |       |
| - Unknown                                          | 2.05 (0.25 – 16.97) |        | 1.41 (0.16 – 12.22) |       |
| HCV genotype                                       |                     | 0.23   |                     |       |
| - 1                                                | 1.00                |        |                     |       |
| - 2                                                | -                   |        |                     |       |
| - 3                                                | 1.33 (0.71 – 2.49)  |        |                     |       |
| - 4                                                | 1.67 (0.92 – 3.03)  |        |                     |       |
| - Other                                            | 3.03 (0.62-14.81)   |        |                     |       |
| HCV RNA IU/mL                                      |                     | 0.25   |                     | 0.096 |
| - < 800,000                                        | 1.00                |        | 1.00                |       |
| - ≥ 800,000                                        | 1.39 (0.80 – 2.42)  |        | 1.65 (0.91 – 2.96)  |       |
| Naïve for anti-HCV therapy                         |                     | 0.56   |                     |       |
| - Yes                                              | 1.00                |        |                     |       |
| - No                                               | 0.86 (0.53 – 1.42)  |        |                     |       |
| Anti-HCV regimen                                   |                     | 0.001  |                     | 0.01  |
| - SOF/LDV                                          | 1.00                |        | 1.00                |       |
| - SOF+DCV                                          | 1.87 (1.00 – 3.48)  |        | 1.79 (0.94 – 3.38)  |       |
| - DSV+OBV/PTV/r                                    | 1.18 (0.51 – 2.75)  |        | 1.20 (0.51 – 2.85)  |       |
| - OBV/PTV/r                                        | 1.23 (0.15 – 9.79)  |        | 1.60 (0.19 – 13.30) |       |
| - SOF+SMV                                          | 5.20 (2.33 – 11.63) |        | 4.22 (1.82 – 9.78)  |       |
| - SOF+RBV                                          | 4.51 (0.88 – 23.15) |        | 5.33 (0.94 – 30.20) |       |
| - SMV+DCV                                          | -                   |        | -                   |       |
| - SOF+SMV+DCV                                      | -                   |        | -                   |       |
| - SOF+OBV/PTV/r                                    | -                   |        | -                   |       |
| Duration of anti-HCV treatment                     |                     | 0.93   |                     |       |
| - 8 weeks                                          | -                   |        |                     |       |
| - 12 weeks                                         | 1.00                |        |                     |       |
| - 16 weeks                                         | -                   |        |                     |       |
| - 24 weeks                                         | 0.98 (0.60 – 1.60)  |        |                     |       |
| Ribavirin use                                      |                     | 0.99   |                     |       |
| - No                                               | 1.00                |        |                     |       |
| - Yes                                              | 1.00 (0.61 – 1.64)  |        |                     |       |

<sup>a</sup> Liver stiffness cutoff: ≤ 19.5 kPa, cutoff accurate to rule out high-risk of esophageal varices.

**Table S11.** Results from univariable and multivariable logistic regression models to identify independent baseline predictors of treatment failure by m-ITT analysis in patients with compensated cirrhosis (N=785)

| Variable                                           | Univariable         |        | Multivariable       |        |
|----------------------------------------------------|---------------------|--------|---------------------|--------|
|                                                    | OR (95% CI)         | P      | OR (95% CI)         | P      |
| Age                                                |                     | 0.14   |                     | 0.10   |
| - <45                                              | 1.00                |        | 1.00                |        |
| - 45-54                                            | 5.53 (0.75 - 40.92) |        | 5.40 (0.71 - 41.00) |        |
| - ≥55                                              | 7.31 (0.95 - 56.15) |        | 7.97 (1.01 - 63.23) |        |
| Sex                                                |                     | 0.31   |                     |        |
| - Female                                           | 1.00                |        |                     |        |
| - Male                                             | 1.52 (0.67 - 3.44)  |        |                     |        |
| HIV risk factor                                    |                     | 0.04   |                     |        |
| - Non-IDU                                          | 1.00                |        |                     |        |
| - IDU                                              | 0.54 (0.20 - 1.46)  |        |                     |        |
| - Other/Unknown                                    | 1.13 (0.41 - 3.13)  |        |                     |        |
| CDC clinical category                              |                     | 0.04   |                     |        |
| - A/B                                              | 1.00                |        |                     |        |
| - C                                                | 0.89 (0.42 - 1.89)  |        |                     |        |
| - Unknown                                          | 1.99 (1.07 - 3.73)  |        |                     |        |
| Nadir CD4+ T-cell count - cells/mm <sup>3</sup>    |                     | 0.02   |                     |        |
| - ≥ 200                                            | 1.00                |        |                     |        |
| - < 200                                            | 1.57 (0.71 - 3.48)  |        |                     |        |
| - Unknown                                          | 2.81 (1.27 - 6.22)  |        |                     |        |
| Baseline CD4+ T-cell count - cells/mm <sup>3</sup> |                     | 0.01   |                     | 0.04   |
| - ≥ 200                                            | 1.00                |        | 1.00                |        |
| - < 200                                            | 2.65 (1.09 - 6.48)  |        | 2.75 (1.07 - 7.08)  |        |
| - Unknown                                          | 2.23 (1.23 - 4.04)  |        | 1.96 (1.04 - 3.66)  |        |
| Baseline HIV RNA copies/mL                         |                     | 0.06   |                     |        |
| - < 50                                             | 1.00                |        |                     |        |
| - ≥ 50                                             | 2.16 (0.72 - 6.50)  |        |                     |        |
| - Unknown                                          | 1.91 (1.06 - 3.44)  |        |                     |        |
| cART                                               |                     | 0.38   |                     |        |
| - Yes                                              | 1.00                |        |                     |        |
| - No                                               | 1.97 (0.44 - 8.90)  |        |                     |        |
| Liver stiffness - kPa <sup>a</sup>                 |                     | <0.001 |                     | 0.01   |
| - < 19.5                                           | 1.00                |        | 1.00                |        |
| - ≥ 19.5                                           | 3.83 (1.89 - 7.73)  |        | 3.04 (1.46 - 6.29)  |        |
| - Unknown                                          | 3.08 (0.36 - 26.23) |        | 1.49 (0.16 - 13.86) |        |
| HCV genotype                                       |                     | 0.27   |                     |        |
| - 1                                                | 1.00                |        |                     |        |
| - 2                                                | -                   |        |                     |        |
| - 3                                                | 1.34 (0.65 - 2.76)  |        |                     |        |
| - 4                                                | 1.90 (0.98 - 3.69)  |        |                     |        |
| - Other                                            | 2.08 (0.25 - 17.23) |        |                     |        |
| HCV RNA IU/mL                                      |                     | 0.76   |                     |        |
| - < 800,000                                        | 1.00                |        |                     |        |
| - ≥ 800,000                                        | 1.10 (0.60 - 2.01)  |        |                     |        |
| Naïve for anti-HCV therapy                         |                     | 0.78   |                     |        |
| - Yes                                              | 1.00                |        |                     |        |
| - No                                               | 1.08 (0.62 - 1.89)  |        |                     |        |
| Anti-HCV regimen                                   |                     | <0.001 |                     | <0.001 |
| - SOF/LDV                                          | 1.00                |        | 1.00                |        |
| - SOF+DCV                                          | 2.37 (1.17 - 4.82)  |        | 2.02 (0.97 - 4.22)  |        |
| - DSV+OBV/PTV/r                                    | 1.59 (0.63 - 4.02)  |        | 1.90 (0.73 - 4.94)  |        |
| - OBV/PTV/r                                        | -                   |        | -                   |        |
| - SOF+SMV                                          | 8.14 (3.51 - 18.88) |        | 6.25 (2.57 - 15.20) |        |
| - SOF+RBV                                          | 7.06 (1.35 - 36.90) |        | 7.60 (1.30 - 44.31) |        |
| - SMV+DCV                                          | -                   |        | -                   |        |
| - SOF+SMV+DCV                                      | -                   |        | -                   |        |
| - SOF+OBV/PTV/r                                    | -                   |        | -                   |        |
| Duration of anti-HCV treatment                     |                     | 0.50   |                     |        |
| - 8 weeks                                          | -                   |        |                     |        |
| - 12 weeks                                         | 1.00                |        |                     |        |
| - 16 weeks                                         | -                   |        |                     |        |
| - 24 weeks                                         | 0.83 (0.47 - 1.44)  |        |                     |        |
| Ribavirin use                                      |                     | 0.85   |                     |        |
| - No                                               | 1.00                |        |                     |        |
| - Yes                                              | 0.95 (0.54 - 1.67)  |        |                     |        |

<sup>a</sup> Liver stiffness cutoff: ≤ 19.5 kPa, cutoff accurate to rule out high-risk of esophageal varices.



**Table S12.** Results from univariable and multivariable logistic regression models to identify independent baseline predictors of treatment failure by ITT analysis in patients with decompensated cirrhosis (N=156)

| Variable                                           | Univariable          |       | Multivariable        |       |
|----------------------------------------------------|----------------------|-------|----------------------|-------|
|                                                    | OR (95% CI)          | P     | OR (95% CI)          | P     |
| Age                                                |                      |       |                      |       |
| – <45                                              | 1.00                 | 0.19  |                      |       |
| – 45-54                                            | 0.37 (0.10 – 1.37)   |       |                      |       |
| – ≥55                                              | 0.69 (0.17 – 2.86)   |       |                      |       |
| Sex                                                |                      |       |                      |       |
| – Female                                           | 1.00                 | 0.045 | 1.00                 | 0.079 |
| – Male                                             | 3.14 (1.03 – 9.58)   |       | 2.94 (0.88 – 9.81)   |       |
| HIV risk factor                                    |                      |       |                      |       |
| – Non-IDU                                          | 1.00                 | 0.84  |                      |       |
| – IDU                                              | 1.43 (0.29 – 6.97)   |       |                      |       |
| – Other/Unknown                                    | 1.16 (0.21 – 6.27)   |       |                      |       |
| CDC clinical category                              |                      |       |                      |       |
| – A/B                                              | 1.00                 | 0.84  |                      |       |
| – C                                                | 1.07 (0.41 – 2.80)   |       |                      |       |
| – Unknown                                          | 0.78 (0.29 – 2.09)   |       |                      |       |
| Nadir CD4+ T-cell count – cells/mm <sup>3</sup>    |                      |       |                      |       |
| – ≥ 200                                            | 1.00                 | 0.79  |                      |       |
| – < 200                                            | 0.83 (0.30 – 2.27)   |       |                      |       |
| – Unknown                                          | 0.67 (0.21 – 2.14)   |       |                      |       |
| Baseline CD4+ T-cell count – cells/mm <sup>3</sup> |                      |       |                      |       |
| – ≥ 200                                            | 1.00                 | 0.90  |                      |       |
| – < 200                                            | 1.22 (0.36 – 4.16)   |       |                      |       |
| – Unknown                                          | 1.20 (0.50 – 2.90)   |       |                      |       |
| Baseline HIV RNA copies/mL                         |                      |       |                      |       |
| – < 50                                             | 1.00                 | 0.72  |                      |       |
| – ≥ 50                                             | 2.00 (0.17 – 23.07)  |       |                      |       |
| – Unknown                                          | 0.78 (0.31 – 1.98)   |       |                      |       |
| cART                                               |                      |       |                      |       |
| – Yes                                              | 1.00                 | 0.53  |                      |       |
| – No                                               | 1.73 (0.32 – 9.37)   |       |                      |       |
| Liver stiffness – kPa <sup>a</sup>                 |                      |       |                      |       |
| – < 19.5                                           | 1.00                 | 0.56  |                      |       |
| – ≥ 19.5                                           | 1.85 (0.59 – 5.81)   |       |                      |       |
| – Unknown                                          | 1.91 (0.37 – 9.95)   |       |                      |       |
| HCV genotype                                       |                      |       |                      |       |
| – 1                                                | 1.00                 | 0.29  |                      |       |
| – 2                                                | 9.62 (0.82 – 112.67) |       |                      |       |
| – 3                                                | 1.60 (0.55 – 4.67)   |       |                      |       |
| – 4                                                | 1.11 (0.39 – 3.14)   |       |                      |       |
| – Other                                            | -                    |       |                      |       |
| HCV RNA IU/mL                                      |                      |       |                      |       |
| – < 800,000                                        | 1.00                 | 0.089 | 1.00                 | 0.097 |
| – ≥ 800,000                                        | 2.06 (0.90 – 4.76)   |       | 2.12 (0.87 – 5.16)   |       |
| Naïve for anti-HCV therapy                         |                      |       |                      |       |
| – Yes                                              | 1.00                 | 0.54  |                      |       |
| – No                                               | 1.29 (0.57 – 2.88)   |       |                      |       |
| Anti-HCV regimen                                   |                      |       |                      |       |
| – SOF/LDV                                          | 1.00                 | 0.36  |                      |       |
| – SOF+DCV                                          | 1.00 (0.35 – 2.87)   |       |                      |       |
| – DSV+OBV/PTV/r                                    | -                    |       |                      |       |
| – OBV/PTV/r                                        | -                    |       |                      |       |
| – SOF+SMV                                          | 1.90 (0.66 – 5.43)   |       |                      |       |
| – SOF+RBV                                          | 3.09 (0.66 – 14.57)  |       |                      |       |
| – SMV+DCV                                          | -                    |       |                      |       |
| – SOF+SMV+DCV                                      | -                    |       |                      |       |
| – SOF+OBV/PTV/r                                    | -                    |       |                      |       |
| Duration of anti-HCV treatment                     |                      |       |                      |       |
| – 8 weeks                                          | -                    | 0.64  |                      |       |
| – 12 weeks                                         | 1.00                 |       |                      |       |
| – 16 weeks                                         | -                    |       |                      |       |
| – 24 weeks                                         | 0.81 (0.34 – 1.95)   |       |                      |       |
| Ribavirin use                                      |                      |       |                      |       |
| – No                                               | 1.00                 | 0.99  |                      |       |
| – Yes                                              | 0.99 (0.45 – 2.21)   |       |                      |       |
| History of hepatocellular carcinoma                |                      |       |                      |       |
| – Yes                                              | 1.00                 | 0.03  | 1.00                 | 0.04  |
| – No                                               | 3.18 (1.12 – 9.07)   |       | 3.32 (1.06 – 10.42)  |       |
| Child-Pugh-Turcotte score                          |                      |       |                      |       |
| – A                                                | 1.00                 | 0.02  | 1.00                 | 0.009 |
| – B                                                | 1.66 (0.70 – 3.94)   |       | 1.85 (0.74 – 4.65)   |       |
| – C                                                | 7.84 (1.82 – 33.79)  |       | 12.01 (2.44 – 59.03) |       |
| MELD score <sup>b</sup>                            |                      |       |                      |       |
| – ≤ 7                                              | 1.00                 | 0.28  |                      |       |
| – > 7                                              | 1.88 (0.60 – 5.83)   |       |                      |       |
| – Unknown                                          | -                    |       |                      |       |

<sup>a</sup> Liver stiffness cutoff: ≤ 19.5 kPa, cutoff accurate to rule out high-risk of esophageal varices.

<sup>b</sup> 7 was the median value of the MELD score

**Table S13.** Results from univariable and multivariable logistic regression models to identify independent baseline predictors of treatment failure by m-ITT analysis in patients with decompensated cirrhosis (N=153)

| Variable                                           | Univariable         |       | Multivariable        |      |
|----------------------------------------------------|---------------------|-------|----------------------|------|
|                                                    | OR (95% CI)         | P     | OR (95% CI)          | P    |
| Age                                                |                     |       |                      |      |
| – <45                                              | 1.00                | 0.09  |                      |      |
| – 45-54                                            | 0.30 (0.08 – 1.15)  |       |                      |      |
| – ≥55                                              | 0.69 (0.17 – 2.86)  |       |                      |      |
| Sex                                                |                     |       |                      | 0.04 |
| – Female                                           | 1.00                | 0.018 | 1.00                 |      |
| – Male                                             | 6.03 (1.36 – 26.69) |       | 5.04 (1.07 – 23.69)  |      |
| HIV risk factor                                    |                     | 0.58  |                      |      |
| – Non-IDU                                          | 1.00                |       |                      |      |
| – IDU                                              | 2.71 (0.33 – 22.34) |       |                      |      |
| – Other/Unknown                                    | 2.03 (0.22 – 18.29) |       |                      |      |
| CDC clinical category                              |                     | 0.73  |                      |      |
| – A/B                                              | 1.00                |       |                      |      |
| – C                                                | 1.23 (0.46 – 3.29)  |       |                      |      |
| – Unknown                                          | 0.77 (0.27 – 2.20)  |       |                      |      |
| Nadir CD4+ T-cell count – cells/mm <sup>3</sup>    |                     | 0.77  |                      |      |
| – ≥ 200                                            | 1.00                |       |                      |      |
| – < 200                                            | 1.16 (0.38 – 3.52)  |       |                      |      |
| – Unknown                                          | 0.8 (0.22 – 2.92)   |       |                      |      |
| Baseline CD4+ T-cell count – cells/mm <sup>3</sup> |                     | 0.83  |                      |      |
| – ≥ 200                                            | 1.00                |       |                      |      |
| – < 200                                            | 1.39 (0.40 – 4.82)  |       |                      |      |
| – Unknown                                          | 1.23 (0.49 – 3.11)  |       |                      |      |
| Baseline HIV RNA copies/mL                         |                     | 0.65  |                      |      |
| – < 50                                             | 1.00                |       |                      |      |
| – ≥ 50                                             | 2.20 (0.19 – 25.47) |       |                      |      |
| – Unknown                                          | 0.73 (0.27 – 1.98)  |       |                      |      |
| cART                                               |                     | 0.95  |                      |      |
| – Yes                                              | 1.00                |       |                      |      |
| – No                                               | 0.93 (0.10 – 8.30)  |       |                      |      |
| Liver stiffness – kPa <sup>a</sup>                 |                     | 0.65  |                      |      |
| – < 19.5                                           | 1.00                |       |                      |      |
| – ≥ 19.5                                           | 1.69 (0.53 – 5.34)  |       |                      |      |
| – Unknown                                          | 1.27 (0.20 – 7.97)  |       |                      |      |
| HCV genotype                                       |                     | 0.27  |                      |      |
| – 1                                                | 1.00                |       |                      |      |
| – 2                                                | 11.0 (0.93 – 129.7) |       |                      |      |
| – 3                                                | 1.53 (0.49 – 4.79)  |       |                      |      |
| – 4                                                | 1.27 (0.44 – 3.64)  |       |                      |      |
| – Other                                            | -                   |       |                      |      |
| HCV RNA IU/mL                                      |                     | 0.10  |                      |      |
| – < 800,000                                        | 1.00                |       |                      |      |
| – ≥ 800,000                                        | 2.06 (0.86 – 4.94)  |       |                      |      |
| Naïve for anti-HCV therapy                         |                     | 0.49  |                      |      |
| – Yes                                              | 1.00                |       |                      |      |
| – No                                               | 1.34 (0.58 – 3.12)  |       |                      |      |
| Anti-HCV regimen                                   |                     | 0.43  |                      |      |
| – SOF/LDV                                          | 1.00                |       |                      |      |
| – SOF+DCV                                          | 1.18 (0.40 – 3.48)  |       |                      |      |
| – DSV+OBV/PTV/r                                    | -                   |       |                      |      |
| – OBV/PTV/r                                        | -                   |       |                      |      |
| – SOF+SMV                                          | 2.24 (0.77 – 6.58)  |       |                      |      |
| – SOF+RBV                                          | 2.44 (0.42 – 14.15) |       |                      |      |
| – SMV+DCV                                          | -                   |       |                      |      |
| – SOF+SMV+DCV                                      | -                   |       |                      |      |
| – SOF+OBV/PTV/r                                    | -                   |       |                      |      |
| Duration of anti-HCV treatment                     |                     | 0.43  |                      |      |
| – 8 weeks                                          | -                   |       |                      |      |
| – 12 weeks                                         | 1.00                |       |                      |      |
| – 16 weeks                                         | -                   |       |                      |      |
| – 24 weeks                                         | 0.70 (0.28 – 1.70)  |       |                      |      |
| Ribavirin use                                      |                     | 0.57  |                      |      |
| – No                                               | 1.00                |       |                      |      |
| – Yes                                              | 0.78 (0.34 – 1.82)  |       |                      |      |
| History of hepatocellular carcinoma                |                     | 0.016 |                      | 0.03 |
| – Yes                                              | 1.00                |       | 1.00                 |      |
| – No                                               | 3.66 (1.27 – 10.56) |       | 3.61 (1.16 – 11.25)  |      |
| Child-Pugh-Turcotte score                          |                     | 0.045 |                      | 0.02 |
| – A                                                | 1.00                |       | 1.00                 |      |
| – B                                                | 1.69 (0.69 – 4.16)  |       | 1.98 (0.76 – 5.18)   |      |
| – C                                                | 6.9 (1.48 – 32.07)  |       | 10.44 (1.97 – 55.22) |      |
| MELD score <sup>b</sup>                            |                     | 0.38  |                      |      |
| – ≤ 7                                              | 1.00                |       |                      |      |
| – > 7                                              | 1.66 (0.53 – 5.20)  |       |                      |      |
| – Unknown                                          | -                   |       |                      |      |

<sup>a</sup> Liver stiffness cutoff: ≤ 19.5 kPa, cutoff accurate to rule out high-risk of esophageal varices.

<sup>b</sup> 7 was the median value of the MELD score
